# Supplementary material for: Comparison of the Pathway to the Inner Ear Between Postauricular and Intramuscular Injection of Dexamethasone in Guinea Pigs
Source: Frontiers journal article supplement (doi:10.3389/fneur.2022.811626), 2022-03-04
Supplement: Table_1.xls [file Table_1.xls]

## Sheet: results 1
results of pharmacokinetic analysis(1)
DAS 2.0, Date of analysis: 2020/3/22
Calculating Settings
Sets	Options		Sets	Options
Name	ABCDE		Dosage	0.15
Usage	Extravascular		Dosage unit	mg/kg
Dose	Single dose		Concentration unit	mg/L
Species	Guinea pig		Time unit	h
Compartment and weight	Default		Low of detection	0.001
First order parameter and fitting effect
First order paraeters	Values		Fitting effects	Values
A	0.039		AIC	44.233
α	0.039		AE	18.733
B	27.124		RE	0.565
β	0.02		R^2	0.949
K	31.15		SBC	46.621
Ka	0.233		Fitting times	378
Compartment model：two compartment model
weight coefficient：1
Pharmacokinetic parameters
Compartment parameters	Units	Values		Statistical moment parameters	Units	Values
t1/2α	h	17.588		AUC(0-t)	mg/L*h	1006.15
t1/2β	h	34.032		AUC(0-∞)	mg/L*h	1177.9
V1/F	L/kg	0.006		AUMC(0-t)		35702
CL/F	L/h/kg	0		AUMC(0-∞)		51205.7
AUC(0-t)	mg/L*h	1014.49		MRT(0-t)	h	35.484
AUC(0-∞)	mg/L*h	1196.34		MRT(0-∞)	h	43.472
K10	1/h	0.021		VRT(0-t)	h^2	535.533
K12	1/h	0		VRT(0-∞)	h^2	1730.77
K21	1/h	0.039		Zeta	1/h	0.021
Ka	1/h	0.233		Zeta		235
t1/2Ka	h	2.97		Cz	mg/L	3.646
Tlag	h	0.643		t1/2z	h	32.643
				Tmax	h	12
				Vz/F	L/kg	0.006
				CLz/F	L/h/kg	0
				Cmax	mg/L	18.2
Concentration-time results
Time(t)	Concentration(C)	Fitting value	Absolute error	Relative error	ln(C)	ln（C）Fitting value
1	2	1.948	0.052	0.026	0.693	0.667	0.667
2	5.3	6.545	-1.245	-0.235	1.668	1.879	2.546
3	10.1	10.084	0.016	0.002	2.313	2.311	4.875
4	15.4	12.788	2.612	0.17	2.734	2.549	7.406
8	16.8	18.259	-1.459	-0.087	2.821	2.905	10.311
12	18.2	19.374	-1.174	-0.065	2.901	2.964	13.275
24	16.9	16.536	0.364	0.022	2.827	2.806	16.081
36	15.1	13.031	2.069	0.137	2.715	2.567	18.648
48	10	10.209	-0.209	-0.021	2.303	2.323	20.971
72	6.1	6.261	-0.161	-0.026	1.808	1.834	22.805
96	2.3	3.84	-1.54	-0.67	0.833	1.345	24.15

## Sheet: results 2
results of pharmacokinetic analysis(2)
DAS 2.0, Date of analysis: 2020/3/22
Calculating Settings
Sets	Options		Sets	Options
Name	ABCDE		Dosage	0.15
Usage	Extravascular		Dosage unit	mg/kg
Dose	Single dose		Concentration unit	mg/L
Species	Guinea pig		Time unit	h
Compartment and weight	Default		Low of detection	0.001
First order parameter and fitting effect
First order paraeters	Values		Fitting effects	Values
A	0.01		AIC	-8.106
α	0.15		AE	26.898
B	37.677		RE	0.161
β	0.028		R^2	1
K	40.338		SBC	-5.719
Ka	0.152		Fitting times	221
Compartment model：two compartment model
weight coefficient：1/cc
Pharmacokinetic parameters
Compartment parameters	Units	Values		Statistical moment parameters	Units	Values
t1/2α	h	4.623		AUC(0-t)	mg/L*h	1006.15
t1/2β	h	24.707		AUC(0-∞)	mg/L*h	1177.9
V1/F	L/kg	0.005		AUMC(0-t)		35702
CL/F	L/h/kg	0		AUMC(0-∞)		51205.7
AUC(0-t)	mg/L*h	990.181		MRT(0-t)	h	35.484
AUC(0-∞)	mg/L*h	1111.26		MRT(0-∞)	h	43.472
K10	1/h	0.028		VRT(0-t)	h^2	535.533
K12	1/h	0		VRT(0-∞)	h^2	1730.77
K21	1/h	0.15		Zeta	1/h	0.021
Ka	1/h	0.152		Zeta		235
t1/2Ka	h	4.558		Cz	mg/L	3.646
Tlag	h	0.548		t1/2z	h	32.643
				Tmax	h	12
				Vz/F	L/kg	0.006
				CLz/F	L/h/kg	0
				Cmax	mg/L	18.2
Concentration-time results
Time(t)	Concentration(C)	Fitting value	Absolute error	Relative error	ln(C)	ln(C)Fitting value
1	2	1.988	0.012	0.006	0.693	0.687
2	5.3	5.862	-0.562	-0.106	1.668	1.769
3	10.1	9.075	1.025	0.101	2.313	2.206
4	15.4	11.723	3.677	0.239	2.734	2.462
8	16.8	18.153	-1.353	-0.081	2.821	2.899
12	18.2	20.403	-2.203	-0.121	2.901	3.016
24	16.9	18.167	-1.267	-0.075	2.827	2.9
36	15.1	13.554	1.546	0.102	2.715	2.607
48	10	9.773	0.227	0.023	2.303	2.28
72	6.1	4.998	1.102	0.181	1.808	1.609
96	2.3	2.549	-0.249	-0.108	0.833	0.936

## Sheet: results of intelligent analysis
Results of intelligent pharmacokinetic analysis
DAS 2.0, Date of analysis: 2020/3/22
Results
Weights		w=1			w=1/c			w=1/cc
Compartments	One compartment	Two compartment	Three compartment	One compartment	Two compartment	Three compartment	One compartment	Two compartment	Three compartment
AIC	40.2293	44.2333		13.8029	17.8029		-12.1059	-8.10589
Sum of relative variance	0.566282	0.564748		0.210554	0.210495		0.160765	0.160765
Sum of absolute variance	18.7265	18.7332		21.6143	21.6167		26.8984	26.8976
Fitting degree R^2	0.94949	0.949472		0.995429	0.995429		0.999566	0.999566
A	27.1453	0.0387998		31.8761	28.8065		37.6776	0.000841901
α	0.0203666	0.0394112		0.0246638	0.0246669		0.0280541	0.149927
B		27.1239			3.07393			37.6772
β		0.0203677			0.0246571			0.0280545
K	31.1381	31.15		35.0789	35.0822		40.3374	40.3376
ka	0.233593	0.233387		0.185996	0.185955		0.152065	0.152065
Fitting times	132	161		141	378		101	221
Compartment model		w=1			w=1/c			w=1/cc
Parameters	One compartment	Two compartment	Three compartment	One compartment	Two compartment	Three compartment	One compartment	Two compartment	Three compartment
t1/2α(h)	34.0336	17.5876		28.1038	28.1003		24.7075	4.62324
t1/2β(h)		34.0317			28.1115			24.7072
t1/2ka	2.96733	2.96995		3.72669	3.7275		4.55823	4.55823
Vd/F(L/kg)
V1/F(L/kg)	0.00615486	0.00605106		0.00539153	0.00542463		0.00481135	0.00488181
CL/F(L/h/kg)	0.000125353	0.000125382		0.000132976	0.000132975		0.000134978	0.000134982
AUC 0-96(mg/L*h)	1014.64	1014.49		986.346	986.366		990.204	990.181
AUC 0-∞(mg/L*h)	1196.62	1196.34		1128.03	1128.04		1111.29	1111.26
k10(1/h)	0.0203666	0.0207207		0.0246638	0.0245131		0.0280541	0.0276499
k12(1/h)		0			0.000152858			0.000405144
k21(1/h)		0.0393865			0.024658			0.149926
Tlag(h)	0.6419	0.6431		0.5915	0.5934		0.548	0.5482
Statistical moment parameters			Compartment judgments
Parameters	Values		Weights	Compartments	F values	Results
AUC 0-96(mg/L*h)	1006.15		1	1:2	0.00679096	P>0.05
AUC 0-∞(mg/L*h)	1177.91			2:3
AUMC 0-96	35702		1/c	1:2	0.000696967	P>0.05
AUMC 0-∞	51205.7			2:3
MRT 0-96(h)	35.4837		1/cc	1:2	1.37432e-07	P>0.05
MRT 0-∞(h)	43.4718			2:3
VRT 0-96(h^2)	535.533		Minimum AIC=	-12.1059	The best compartment=	One compartment w=1/cc
VRT 0-∞(h^2)	1730.77		Subminimum AIC=	-8.10589	The better compartment=	Two compartment w=1/cc
MAT(h)	48.8112
Tmax(h)	12
Cmax(mg/L)	18.2
