# Supplementary material for: Comparison of the Pathway to the Inner Ear Between Postauricular and Intramuscular Injection of Dexamethasone in Guinea Pigs
Source: Frontiers journal article supplement (doi:10.3389/fneur.2022.811626), 2022-03-04
Supplement: Table_2.xls [file Table_2.xls]

## Sheet: results 1
results of pharmacokinetic analysis(1)
DAS 2.0, Date of analysis: 2020/3/22
Calculating Settings
Sets	Options		Sets	Options
Name	ABCDE		Dosage	0.15
Usage	Extravascular		Dosage unit	mg/kg
Dose	Single dose		Concentration unit	mg/L
Species	Guinea pig		Time unit	h
Compartment and weight	Default		Low of detection	0.001
First order parameter and fitting effect
First order paraeters	Values		Fitting effects	Values
A	9.545		AIC	26.387
α	0.041		AE	4.215
B	20.322		RE	0.162
β	0.041		R^2	0.991
K	38.518		SBC	28.202
Ka	0.465		Fitting times	255
Compartment model：two compartment mode
weight coefficient：1
Pharmacokinetic parameters
Compartment parameters	Units	Values		Statistical moment parameters	Units	Values
t1/2α	h	16.927		AUC(0-t)	mg/L*h	614.69
t1/2β	h	16.928		AUC(0-∞)	mg/L*h	672.098
V1/F	L/kg	0.006		AUMC(0-t)		13633.2
CL/F	L/h/kg	0		AUMC(0-∞)		19405
AUC(0-t)	mg/L*h	621.717		MRT(0-t)	h	22.179
AUC(0-∞)	mg/L*h	666.931		MRT(0-∞)	h	28.872
K10	1/h	0.041		VRT(0-t)	h^2	290.42
K12	1/h	0		VRT(0-∞)	h^2	802.855
K21	1/h	0.041		Zeta	1/h	0.036
Ka	1/h	0.465		Zeta		145
t1/2Ka	h	1.491		Cz	mg/L	2.08
Tlag	h	0.6		t1/2z	h	19.124
				Tmax	h	8
				Vz/F	L/kg	0.006
				CLz/F	L/h/kg	0
				Cmax	mg/L	20.1
Concentration-time results
Time(t)	Concentration(C)	Fitting value	Absolute error	Relative error	ln(C)	ln（C）Fitting value
1	4	4.47	-0.47	-0.118	1.386	1.497	1.497
2	13.4	12.316	1.084	0.081	2.595	2.511	4.008
3	16.9	16.863	0.037	0.002	2.827	2.825	6.833
4	18.5	19.354	-0.854	-0.046	2.918	2.963	9.796
8	20.1	20.59	-0.49	-0.024	3.001	3.025	12.821
12	19	18.127	0.873	0.046	2.944	2.897	15.718
24	11.3	11.178	0.122	0.011	2.425	2.414	18.132
36	6.9	6.839	0.061	0.009	1.932	1.923	20.055
48	3.3	4.184	-0.884	-0.268	1.194	1.431	21.486
72	2.1	1.566	0.534	0.254	0.742	0.449	21.935

## Sheet: results 2
results of pharmacokinetic analysis(2)
DAS 2.0, Date of analysis: 2020/3/22
Calculating Settings
Sets	Options		Sets	Options
Name	ABCDE		Dosage	0.15
Usage	Extravascular		Dosage unit	mg/kg
Dose	Single dose		Concentration unit	mg/L
Species	Guinea pig		Time unit	h
Compartment and weight	Default		Low of detection	0.001
First order parameter and fitting effect
First order paraeters	Values		Fitting effects	Values
A	34.196		AIC	-15.413
α	0.055		AE	7.37
B	1.369		RE	0.064
β	0.01		R^2	1
K	44.198		SBC	-13.597
Ka	0.399		Fitting times	490
Compartment model：two compartment model
weight coefficient：1/cc
weight coefficient
Compartment parameters	Units	Values		Statistical moment parameters	Units	Values
t1/2α	h	12.528		AUC(0-t)	mg/L*h	614.69
t1/2β	h	69.315		AUC(0-∞)	mg/L*h	672.098
V1/F	L/kg	0.005		AUMC(0-t)		13633.2
CL/F	L/h/kg	0		AUMC(0-∞)		19405
AUC(0-t)	mg/L*h	608.99		MRT(0-t)	h	22.179
AUC(0-∞)	mg/L*h	666.332		MRT(0-∞)	h	28.872
K10	1/h	0.046		VRT(0-t)	h^2	290.42
K12	1/h	0.007		VRT(0-∞)	h^2	802.855
K21	1/h	0.012		Zeta	1/h	0.036
Ka	1/h	0.399		Zeta		145
t1/2Ka	h	1.739		Cz	mg/L	2.08
Tlag	h	0.63		t1/2z	h	19.124
				Tmax	h	8
				Vz/F	L/kg	0.006
				CLz/F	L/h/kg	0
				Cmax	mg/L	20.1
Concentration-time results
Time(t)	Concentration(C)	Fitting value	Absolute error	Relative error	ln(C)	ln(C)Fitting value
1	4	4.056	-0.056	-0.014	1.386	1.4
2	13.4	12.068	1.332	0.099	2.595	2.491
3	16.9	16.967	-0.067	-0.004	2.827	2.831
4	18.5	19.803	-1.303	-0.07	2.918	2.986
8	20.1	21.513	-1.413	-0.07	3.001	3.069
12	19	18.604	0.396	0.021	2.944	2.923
24	11.3	10.429	0.871	0.077	2.425	2.345
36	6.9	6.035	0.865	0.125	1.932	1.798
48	3.3	3.771	-0.471	-0.143	1.194	1.327
72	2.1	2.005	0.095	0.045	0.742	0.696

## Sheet: Results of intelligent analysis
Results of intelligent pharmacokinetic analysis
DAS 2.0, Date of analysis: 2020/3/22
Results
Weights		w=1			w=1/c			w=1/cc
Compartments	One compartment	Two compartment	Three compartment	One compartment	Two compartment	Three compartment	One compartment	Two compartment	Three compartment
AIC	22.3865	26.3865		2.33827	4.59851		-11.6288	-15.4129
Sum of relative variance	0.161819	0.161821		0.148226	0.0821778		0.140453	0.0644874
Sum of absolute variance	4.21502	4.21502		4.45819	4.94371		6.60236	7.36955
Fitting degreeR^2	0.990528	0.990528		0.998724	0.998928		0.999684	0.999855
A	29.8676	9.54511		29.631	30.9785		27.4853	34.1955
α	0.0409485	0.0409503		0.0411914	0.0475767		0.0392886	0.0553276
B		20.3224			0.861186			1.36898
β		0.0409471			1.88327e-06			2.12987e-06
K	38.518	38.5179		39.6522	40.9761		39.6406	44.1981
ka	0.464807	0.464812		0.489094	0.445495		0.570474	0.398612
Fitting times	178	137		130	255		113	490
Compartment model		w=1			w=1/c			w=1/cc
Parameters	One compartment	Two compartment	Three compartment	One compartment	Two compartment	Three compartment	One compartment	Two compartment	Three compartment
t1/2α(h)	16.9273	16.9265		16.8275	14.569		17.6424	12.5281
t1/2β(h)		16.9279			69.3147			69.3147
t1/2ka	1.49126	1.49124		1.41721	1.5559		1.21504	1.7389
Vd/F(L/kg)
V1/F(L/kg)	0.00549256	0.00550736		0.00552211	0.00526094		0.00587237	0.00487269
CL/F(L/h/kg)	0.000224912	0.000224911		0.000227463	0.000224617		0.000230717	0.000225113
AUC 0-72(mg/L*h)	621.715	621.717		615.319	614.231		603.332	608.99
AUC 0-∞(mg/L*h)	666.928	666.931		659.447	667.804		650.147	666.332
k10(1/h)	0.0409485	0.0408382		0.0411914	0.0426952		0.0392886	0.046199
k12(1/h)		0.000109914			0.00377206			0.00716345
k21(1/h)		0.0409493			0.0111095			0.0119652
Tlag(h)	0.5993	0.6001		0.6497	0.6324		0.6888	0.6299
Statistical moment parameters			Compartment judgments
Parameters	Values		Weights	Compartments	F values	Results
AUC 0-72(mg/L*h)	614.69		1	1:2	2.84094e-05	P>0.05
AUC 0-∞(mg/L*h)	672.098			2:3
AUMC 0-72	13633.2		1/c	1:2	1.60745	P<0.05
AUMC 0-∞	19405			2:3
MRT 0-72(h)	22.179		1/cc	1:2	2.356	P<0.05
MRT 0-∞(h)	28.8722			2:3
VRT 0-72(h^2)	290.42		Minimum AIC=	-15.4129	The best compartment=	Two compartment w=1/cc
VRT 0-∞(h^2)	802.855		Subminimum AIC=	-11.6288	The better compartment=	One compartment w=1/cc
MAT(h)	30.0275
Tmax(h)	8
Cmax(mg/L)	20.1
